# Supplementary material
Source: Copernicus journal article supplement (doi:10.5194/acp-26-7031-2026)
Supplement: Supplementary file 1 [file acp-26-7031-2026-supplement.pdf]

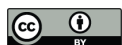

*Supplement of*

## **Secondary formation dominated low molecular weight amines origins in aerosols over the marginal seas of China**

**Xiao-Ying Yang et al.**

*Correspondence to:* Yan-Lin Zhang ([dryanlinzhang@outlook.com](mailto:dryanlinzhang@outlook.com), [zhangyanlin@nuist.edu.cn](mailto:zhangyanlin@nuist.edu.cn))

The copyright of individual parts of the supplement might differ from the article licence.

17 **Content:**

18 **List of contents:**

19 **Supplementary tables**

20 Table S1. Summary of sampling information during the cruise.

21 Table S2. Statistical summary of measured chemical components.

22 Table S3. Concentrations of amines in marine and coastal atmospheres.

23 Table S4. Correlation coefficients between amines and organic molecular tracers in  
24 TSP over the YS–BS.

25 **Supplementary figures**

26 Figure S1. Map of the hourly sampling positions along the cruise track over the  
27 YS–BS, together with a schematic diagram of the sampling setup.

28 Figure S2. Map of chlorophyll *a* concentrations in surface seawater over the YS–BS  
29 during the cruise.

30 Figure S3. 48 h backward air-mass trajectories starting from the position and time  
31 point at the beginning of each sampling, with hourly intervals thereafter.

32 Figure S4. Spatial distributions of MA (a), EA (b), DMA (c), IPA (d), PA (e), and  
33 TMDEA (f) in TSP samples over the YS–BS.

34 Figure S5. Variations of OC/EC ratios (a),  $\sum\text{amines-C/OC}$  ratios (b),  $\sum\text{amines}/\text{NH}_4^+$   
35 molar ratios (c), and  $\text{NH}_4^+(\text{Cl}^- + \text{NO}_3^- + 2\times\text{SO}_4^{2-})$  molar ratios (d) in TSP over the  
36 SYS, NYS, and BS.

37 Figure S6. Linear regressions between amines and acidic species in TSP over the SYS,  
38 NYS, and BS.

39

40 **Supplementary tables**41 **Table S1.** Summary of sampling information during the cruise.

| Sample ID | Sampling period |                | Sampling duration (min) | Midpoint position of the sampling period |               | Sea area | Average ambient temperature (°C) | Average relative humidity (%) | Average wind speed (m s <sup>-1</sup> ) |
|-----------|-----------------|----------------|-------------------------|------------------------------------------|---------------|----------|----------------------------------|-------------------------------|-----------------------------------------|
|           | Start time      | End time       |                         | Longitude (°E)                           | Latitude (°N) |          |                                  |                               |                                         |
| S2        | 16:30, 28 Mar.  | 16:30, 29 Mar. | 1020                    | 122.32                                   | 36.00         | SYS      | 8.2                              | 99.3                          | 6.4                                     |
| S3        | 16:38, 29 Mar.  | 16:20, 30 Mar. | 810                     | 123.95                                   | 34.98         | SYS      | 9.1                              | 86.3                          | 5.2                                     |
| S4        | 17:20, 30 Mar.  | 15:10, 31 Mar. | 1170                    | 121.12                                   | 34.67         | SYS      | 8.8                              | 99.2                          | 4.9                                     |
| S5        | 15:40, 31 Mar.  | 15:13, 1 Apr.  | 1110                    | 124.00                                   | 34.00         | SYS      | 12.2                             | 100.0                         | 6.9                                     |
| S6        | 15:15, 1 Apr.   | 15:20, 2 Apr.  | 1050                    | 122.15                                   | 32.65         | SYS      | 12.1                             | 100.0                         | 7.2                                     |
| S8        | 15:30, 2 Apr.   | 20:40, 2 Apr.  | 450                     | 123.98                                   | 32.00         | SYS      | 13.0                             | 99.7                          | 6.6                                     |
| S10       | 15:30, 3 Apr.   | 19:34, 3 Apr.  | 450                     | 122.23                                   | 35.50         | SYS      | 7.8                              | 100.0                         | 11.1                                    |
| S12       | 16:30, 7 Apr.   | 17:41, 8 Apr.  | 840                     | 123.70                                   | 37.15         | SYS      | 6.2                              | 68.9                          | 6.7                                     |
| S13       | 19:11, 8 Apr.   | 18:20, 9 Apr.  | 1050                    | 121.85                                   | 38.63         | NYS      | 7.1                              | 83.4                          | 6.7                                     |
| S14       | 09:00, 10 Apr.  | 07:50, 11 Apr. | 810                     | 119.38                                   | 37.80         | BS       | 10.9                             | 67.4                          | 7.7                                     |
| S15       | 16:53, 11 Apr.  | 16:53, 12 Apr. | 630                     | 119.93                                   | 39.22         | BS       | 7.8                              | 67.4                          | 7.5                                     |
| S16       | 18:03, 12 Apr.  | 18:00, 13 Apr. | 540                     | 120.63                                   | 38.33         | BS       | 8.3                              | 66.6                          | 6.6                                     |
| S17       | 18:05, 13 Apr.  | 20:00, 14 Apr. | 1410                    | 123.12                                   | 38.75         | NYS      | 6.1                              | 93.2                          | 5.0                                     |
| S18       | 14:31, 15 Apr.  | 14:33, 16 Apr. | 810                     | 123.08                                   | 38.15         | NYS      | 7.1                              | 79.8                          | 4.7                                     |
| S19       | 15:00, 16 Apr.  | 23:58, 16 Apr. | 540                     | 121.78                                   | 36.35         | SYS      | 9.1                              | 81.5                          | 5.2                                     |

42

43 **Table S2.** Statistical summary of measured chemical components.

| Component (ng m <sup>-3</sup> )                                                             | SYS (N = 9)     | NYS (N = 3)      | BS (N = 3)       |
|---------------------------------------------------------------------------------------------|-----------------|------------------|------------------|
| Amines                                                                                      | 40.4 ± 16.4     | 43.5 ± 17.5      | 63.6 ± 18.3      |
| MA                                                                                          | 10.0 ± 7.0      | 15.7 ± 7.7       | 22.8 ± 15.0      |
| EA                                                                                          | 1.7 ± 0.6       | 2.0 ± 1.8        | 3.0 ± 1.3        |
| DMA                                                                                         | 3.5 ± 2.1       | 3.8 ± 2.6        | 7.9 ± 2.1        |
| IPA                                                                                         | 1.9 ± 0.9       | 1.3 ± 0.7        | 2.1 ± 1.4        |
| PA                                                                                          | 2.5 ± 0.9       | 3.0 ± 0.7        | 4.1 ± 0.7        |
| TMDEA                                                                                       | 20.7 ± 9.1      | 17.8 ± 7.3       | 23.8 ± 3.7       |
| Water soluble inorganic ions (WSIIs)                                                        | 8692.1 ± 4363.1 | 13043.1 ± 6299.9 | 26912.3 ± 4926.0 |
| Na <sup>+</sup>                                                                             | 510.4 ± 455.1   | 714.7 ± 459.3    | 1626.9 ± 323.8   |
| NH <sub>4</sub> <sup>+</sup>                                                                | 1642.1 ± 657.5  | 2357.2 ± 989.6   | 3778.2 ± 481.2   |
| K <sup>+</sup>                                                                              | 162.8 ± 70.5    | 183.3 ± 74.7     | 481.4 ± 110.4    |
| Mg <sup>2+</sup>                                                                            | 41.3 ± 38.9     | 82.9 ± 51.3      | 271.0 ± 49.4     |
| Ca <sup>2+</sup>                                                                            | 253.5 ± 199.1   | 456.6 ± 199.6    | 1949.9 ± 441.7   |
| F <sup>-</sup>                                                                              | 12.3 ± 10.1     | 28.6 ± 31.2      | 36.1 ± 7.3       |
| Cl <sup>-</sup>                                                                             | 237.6 ± 411.3   | 602.2 ± 425.1    | 1582.1 ± 570.7   |
| NO <sub>2</sub> <sup>-</sup>                                                                | 4.4 ± 3.5       | 2.8 ± 2.2        | 4.3 ± 5.3        |
| NO <sub>3</sub> <sup>-</sup>                                                                | 1805.9 ± 2097.6 | 5255.1 ± 2655.6  | 10569.0 ± 3189.7 |
| SO <sub>4</sub> <sup>2-</sup>                                                               | 4021.8 ± 2178.3 | 3359.6 ± 1544.8  | 6613.4 ± 893.5   |
| Low molecular organic acids                                                                 | 249.3 ± 124.3   | 204.0 ± 91.0     | 247.7 ± 17.0     |
| CHO <sub>2</sub> <sup>-</sup>                                                               | 31.8 ± 8.9      | 38.8 ± 26.2      | 50.6 ± 10.6      |
| C <sub>2</sub> H <sub>3</sub> O <sub>2</sub> <sup>-</sup>                                   | 29.5 ± 13.5     | 27.4 ± 10.8      | 52.1 ± 20.1      |
| C <sub>4</sub> H <sub>4</sub> O <sub>4</sub> <sup>2-</sup>                                  | 44.9 ± 36.0     | 40.5 ± 28.1      | 58.2 ± 8.3       |
| C <sub>5</sub> H <sub>6</sub> O <sub>4</sub> <sup>2-</sup>                                  | 43.7 ± 26.3     | 47.9 ± 27.4      | 47.1 ± 2.2       |
| CH <sub>3</sub> O <sub>3</sub> S <sup>-</sup> (MSA <sup>-</sup> )                           | 99.5 ± 76.1     | 49.5 ± 39.9      | 39.7 ± 8.2       |
| Carbonaceous components (TC)                                                                | 4670.7 ± 1511.5 | 5911.3 ± 1775.7  | 9467.5 ± 1774.8  |
| Organic carbon (OC)                                                                         | 4227.8 ± 1375.7 | 5126.6 ± 1344.7  | 8448.9 ± 1627.7  |
| Elemental carbon (EC)                                                                       | 442.9 ± 159.5   | 784.7 ± 431.6    | 1018.6 ± 156.8   |
| Organic compositions                                                                        | 126.2 ± 74.3    | 230.6 ± 159.8    | 474.8 ± 174.6    |
| <i>n</i> -Alkanes (ALK, C <sub>14</sub> -C <sub>35</sub> )                                  | 41.4 ± 22.5     | 50.6 ± 20.8      | 93.8 ± 29.1      |
| ALK <sub>LMW</sub> (C <sub>20</sub> -C <sub>26</sub> )                                      | 22.9 ± 13.8     | 25.4 ± 10.3      | 40.3 ± 10.6      |
| ALK <sub>HMW</sub> (C <sub>27</sub> , C <sub>29</sub> , C <sub>31</sub> , C <sub>33</sub> ) | 11.2 ± 6.0      | 16.9 ± 7.4       | 35.9 ± 13.5      |
| Fatty acids (FA, C <sub>14:0</sub> -C <sub>30:0</sub> )                                     | 33.4 ± 15.4     | 56.4 ± 49.9      | 67.9 ± 25.3      |
| FA <sub>LMW</sub> (≤ C <sub>19:0</sub> )                                                    | 24.1 ± 6.5      | 29.8 ± 19.6      | 54.0 ± 20.1      |
| FA <sub>HMW</sub> (> C <sub>19:0</sub> )                                                    | 3.6 ± 3.0       | 10.3 ± 8.3       | 11.5 ± 4.1       |
| Fatty alcohols (ALC, C <sub>15</sub> -C <sub>30</sub> )                                     | 2.9 ± 1.3       | 5.0 ± 3.0        | 8.7 ± 3.2        |
| ALC <sub>LMW</sub> (≤ C <sub>19alc</sub> )                                                  | 1.4 ± 0.5       | 1.0 ± 0.6        | 1.5 ± 0.4        |

| Component (ng m <sup>-3</sup> )            | SYS (N = 9) | NYS (N = 3) | BS (N = 3)   |
|--------------------------------------------|-------------|-------------|--------------|
| ALC <sub>HMW</sub> (> C <sub>19alc</sub> ) | 1.5 ± 0.9   | 3.9 ± 2.4   | 7.2 ± 3.0    |
| Polycyclic aromatic hydrocarbons (PAHs)    | 0.9 ± 0.8   | 2.0 ± 1.1   | 3.9 ± 1.5    |
| Hopanes                                    | 3.0 ± 3.7   | 2.4 ± 1.3   | 4.6 ± 2.5    |
| Steranes                                   | 0.5 ± 0.5   | 0.4 ± 0.2   | 0.9 ± 0.5    |
| Anhydrosugars                              | 20.0 ± 27.4 | 46.2 ± 36.7 | 69.8 ± 22.9  |
| Lignin products                            | 2.0 ± 1.5   | 4.3 ± 2.4   | 6.6 ± 1.4    |
| Primary sugars and sugar alcohols          | 11.8 ± 10.7 | 37.4 ± 32.0 | 190.0 ± 97.4 |
| Hydroxy-/polyacids                         | 3.4 ± 2.9   | 11.5 ± 9.1  | 7.8 ± 1.7    |
| Aromatic acids                             | 3.4 ± 2.3   | 7.3 ± 4.1   | 10.0 ± 2.4   |
| Isoprene SOA (SOA <sub>I</sub> )           | 0.4 ± 0.2   | 0.9 ± 0.6   | 1.7 ± 0.8    |
| Monoterpene SOA (SOA <sub>M</sub> )        | 2.1 ± 1.2   | 4.8 ± 2.8   | 7.6 ± 3.3    |
| β-Caryophyllene SOA (SOA <sub>C</sub> )    | 0.3 ± 0.3   | 0.5 ± 0.3   | 0.8 ± 0.3    |
| 2,3-dihydroxy-4-oxopentanoic acid (DHOPA)  | 0.5 ± 0.3   | 0.8 ± 0.4   | 0.6 ± 0.1    |

44 Note: The data format is mean ± standard deviation.

45

46 **Table S3.** Concentrations of amines in marine and coastal atmospheres.

| Sea area                  | Sampling period        | Particle size or gas   | Concentrations of amines (ng m <sup>-3</sup> ) |     |          |     |     |         | Reference            |
|---------------------------|------------------------|------------------------|------------------------------------------------|-----|----------|-----|-----|---------|----------------------|
|                           |                        |                        | MA                                             | EA  | DMA      | IPA | PA  | TMDEA   |                      |
| SYS                       | March–April 2018       | TSP                    | 10.0                                           | 1.7 | 3.5      | 1.9 | 2.5 | 20.7    | This study           |
| NYS                       | April 2018             |                        | 15.7                                           | 2.0 | 3.8      | 1.3 | 3.0 | 17.8    |                      |
| BS                        | April 2018             |                        | 22.8                                           | 3.0 | 7.9      | 2.1 | 4.1 | 23.8    |                      |
| ECS–SCS–YS<br>(Coastline) | April–May 2018         | Gas                    |                                                |     | 11.0     |     |     | 5.4     | (Chen et al., 2022)  |
|                           | April–May 2018         | PM <sub>2.5</sub>      |                                                |     | < 4–100* |     |     | < 2–21* |                      |
| Coastal Qingdao, China    | January–February 2018  | PM <sub>2.5</sub>      | 8.5                                            | 2.7 | 58.7     |     | 0.9 | 19.3    | (Liu et al., 2022)   |
|                           | November–December 2019 |                        | 6.9                                            | 2.4 | 86.3     |     | 0.9 | 14.6    |                      |
| Huaniao Island, China     | January 2013           | PM <sub>2.5</sub>      | 4.8                                            | 0.8 |          |     | 2.5 |         | (Huang et al., 2018) |
| SYS–ECS                   | March–May 2015         | PM <sub>10</sub>       |                                                |     | 18.4     |     |     | 22.8    | (Yu et al., 2016)    |
| NWPO                      | April 2015             |                        |                                                |     | 12.9     |     |     | 13.2    |                      |
| SYS                       | August 2015            |                        |                                                |     | 42.8     |     |     | 45.6    |                      |
| SYS                       | November 2013          |                        |                                                |     | 19.8     |     |     | 37.0    |                      |
| SYS                       | November 2012          |                        |                                                |     | 13.4     |     |     | 30.0    |                      |
| NYS–BS                    | August–September 2015  |                        |                                                |     | 20.7     |     |     | 28.8    |                      |
| NYS–BS                    | November 2012          |                        |                                                |     | ≈ MDL    |     |     | 15.0    |                      |
| YS–NWPO                   | April 2015             | PM <sub>0.056–10</sub> |                                                |     | 12.9     |     |     | 13.2    |                      |
| ECS                       | June 2016              |                        |                                                |     | 30.8     |     |     | 12.0    |                      |
| YS–BS                     | June–July 2016         |                        |                                                |     | 50.6     |     |     | 21.0    |                      |
| YS–BS                     | August 2015            |                        |                                                |     | 23.9     |     |     | 18.6    |                      |
| SYS                       | November 2013          |                        |                                                |     | 18.9     |     |     | 31.8    |                      |
| Coastal Qingdao, China    | August 2016            |                        |                                                |     | 28.5     |     |     | 9.0     |                      |

| Sea area                                   | Sampling period        | Particle size or gas    | Concentrations of amines (ng m <sup>-3</sup> ) |      |      |     |      | Reference |                                  |
|--------------------------------------------|------------------------|-------------------------|------------------------------------------------|------|------|-----|------|-----------|----------------------------------|
|                                            |                        |                         | MA                                             | EA   | DMA  | IPA | PA   |           | TMDEA                            |
| YS-BS                                      | May 2012               | PM <sub>0.43</sub>      |                                                |      | 46.0 |     |      | 108       | (Hu et al., 2015)                |
|                                            |                        | PM <sub>11</sub>        |                                                |      | 202  |     |      | 432       |                                  |
| Huaniao Island, China                      | March–April 2017       | PM <sub>1.8</sub>       |                                                |      | 11.9 |     |      | 14.6      | (Zhou et al., 2019)              |
|                                            |                        | PM <sub>10</sub>        |                                                |      | 13.5 |     |      | 16.6      |                                  |
|                                            | August 2016            | PM <sub>2.5</sub>       |                                                |      | 4.0  |     |      | 8.7       |                                  |
|                                            | November–December 2016 | PM <sub>1.8</sub>       |                                                |      | 10.7 |     |      | 6.0       |                                  |
|                                            |                        | PM <sub>10</sub>        |                                                |      | 15.1 |     |      | 8.4       |                                  |
|                                            | March 2017             | PM <sub>1.8</sub>       |                                                |      | 6.8  |     |      | 2.7       |                                  |
|                                            | March 2017             | PM <sub>10</sub>        |                                                |      | 11.4 |     |      | 3.1       |                                  |
|                                            | June–July 2017         | PM <sub>1.8</sub>       |                                                |      | 29.0 |     |      | 24.8      |                                  |
|                                            | June–July 2017         | PM <sub>10</sub>        |                                                |      | 32.2 |     |      | 27.5      |                                  |
|                                            | August–September 2017  | PM <sub>1.8</sub>       |                                                |      | 25.8 |     |      | 25.0      |                                  |
| August–September 2017                      | PM <sub>10</sub>       |                         |                                                | 27.4 |      |     | 26.3 |           |                                  |
| Arabian Sea                                | August–October 1994    | PM <sub>0.9</sub>       | 3.2                                            |      | 2.1  |     |      | 0.3       | (Gibb et al., 1999)              |
|                                            | November–December 1994 |                         | 3.7                                            |      | 11.0 |     |      | 0.5       |                                  |
| North Atlantic                             | June–July 2006         | PM <sub>1</sub>         |                                                |      | 14.7 |     |      | 14.3      | (Facchini et al., 2008)          |
| Mace Head, Ireland                         | January–December 2006  |                         |                                                |      | 4.7  |     |      | 7.6       |                                  |
| East Mediterranean, Greece                 | 2005–2006              | PM <sub>1</sub>         |                                                |      | 9.2  |     |      | < MDL     | (Violaki and Mihalopoulos, 2010) |
| Cape Verde, northeast<br>Tropical Atlantic | May 2007               | PM <sub>0.14–0.42</sub> | 0.02                                           |      | 0.22 |     |      | 0.06      | (Müller et al., 2009)            |
|                                            | June 2007              |                         | 0.06                                           |      | 0.2  |     |      | 0.08      |                                  |
|                                            | December 2007          |                         | 0.18                                           |      | 0.57 |     |      | 0.32      |                                  |
| Jeju Island, South Korea                   | March–April 2001       | PM <sub>2.5</sub>       | 13.5                                           | 3.1  |      |     |      |           | (Yang et al., 2004)              |

| Sea area                                 | Sampling period        | Particle size or gas | Concentrations of amines (ng m <sup>-3</sup> ) |    |     |     |    | Reference |                           |
|------------------------------------------|------------------------|----------------------|------------------------------------------------|----|-----|-----|----|-----------|---------------------------|
|                                          |                        |                      | MA                                             | EA | DMA | IPA | PA |           | TMDEA                     |
| Cape Verde, tropical                     | November 2011 and 2013 | Gas                  | 0.8                                            |    | 4.5 |     |    | < MDL     | (Pinxteren et al., 2019)  |
| Atlantic Ocean                           | November 2011 and 2013 | PM <sub>1</sub>      | 0.2                                            |    | 5.6 |     |    | 3.9       |                           |
| Off the central coast of California, USA | July 2007              | PM <sub>1</sub>      |                                                |    |     |     |    | 22.0      | (Sorooshian et al., 2009) |

47 Note: \* represent ranges; all other data are mean values; blank cells indicate not measured. Some TMDEA values were reported as TMA, as TMA was expected to  
48 overwhelm DEA in marine and coastal environments, although they are co-eluted in IC analysis. The SYS, NYS, BS, ECS, SCS and NWPO represent the South  
49 Yellow Sea, North Yellow Sea, Bohai Sea, East China Sea, South China Sea and Northwest Pacific Ocean, respectively.

50

51 **Table S4.** Correlation coefficients between amines and organic molecular tracers in  
 52 TSP over the YS–BS.

| Source                       | Tracer                            | MA            | EA           | DMA           | IPA   | PA            | TMDEA |
|------------------------------|-----------------------------------|---------------|--------------|---------------|-------|---------------|-------|
| Primary biogenic sources     | Primary sugars and sugar alcohols | <b>0.72**</b> | <b>0.55*</b> | <b>0.64**</b> | -0.12 | 0.45          | 0.23  |
|                              | Fungal spore OC                   | <b>0.70**</b> | <b>0.57*</b> | <b>0.64**</b> | -0.10 | 0.49          | 0.18  |
|                              | Plant debris OC                   | <b>0.72**</b> | <b>0.53*</b> | <b>0.66**</b> | -0.12 | 0.47          | 0.26  |
| Higher plant waxes           | ALK <sub>HMW</sub>                | <b>0.60*</b>  | 0.51         | <b>0.58*</b>  | 0.06  | <b>0.60*</b>  | 0.20  |
|                              | FA <sub>HMW</sub>                 | 0.39          | 0.11         | 0.25          | 0.00  | 0.50          | 0.19  |
|                              | ALC <sub>HMW</sub>                | <b>0.70**</b> | 0.49         | <b>0.58*</b>  | -0.12 | <b>0.53*</b>  | 0.25  |
| Marine/microbial sources     | FA <sub>LMW</sub>                 | 0.48          | 0.29         | 0.35          | 0.02  | <b>0.53*</b>  | 0.14  |
|                              | ALC <sub>LMW</sub>                | 0.05          | -0.04        | -0.05         | 0.03  | 0.07          | 0.06  |
| BSOA                         | Isoprene SOC                      | <b>0.73**</b> | 0.44         | <b>0.55*</b>  | -0.18 | 0.42          | 0.33  |
|                              | Monoterpene SOC                   | <b>0.69**</b> | 0.43         | 0.47          | -0.11 | 0.43          | 0.34  |
|                              | $\beta$ -Caryophyllene SOC        | 0.24          | 0.13         | 0.35          | 0.27  | <b>0.67**</b> | 0.18  |
| Biomass burning              | Levogluctosan (Lev)               | 0.35          | 0.23         | 0.36          | -0.00 | 0.44          | 0.15  |
|                              | Lev <sub>bb</sub>                 | 0.45          | 0.33         | 0.48          | 0.02  | <b>0.52*</b>  | 0.17  |
|                              | Lignin products                   | 0.49          | 0.30         | 0.47          | 0.09  | <b>0.63*</b>  | 0.28  |
| Fossil fuel combustion       | ALK <sub>LMW</sub>                | 0.33          | 0.31         | 0.46          | 0.15  | <b>0.67**</b> | 0.15  |
|                              | PAHs                              | <b>0.57*</b>  | 0.41         | <b>0.54*</b>  | 0.08  | <b>0.63*</b>  | 0.21  |
|                              | Hopanes                           | 0.13          | -0.08        | 0.22          | 0.27  | <b>0.55*</b>  | 0.30  |
|                              | Steranes                          | 0.09          | -0.03        | 0.22          | 0.27  | <b>0.57*</b>  | 0.19  |
| Secondary oxidation products | Aromatic acids                    | 0.44          | 0.30         | 0.40          | -0.02 | <b>0.63*</b>  | 0.19  |
|                              | Hydroxy-/polyacids                | 0.26          | -0.08        | 0.04          | -0.19 | 0.25          | 0.20  |
|                              | DHOPA                             | 0.16          | -0.05        | -0.12         | 0.14  | 0.01          | 0.47  |

53 Note: \*\* represent  $P < 0.01$ , and \* represent  $P < 0.05$ .

54

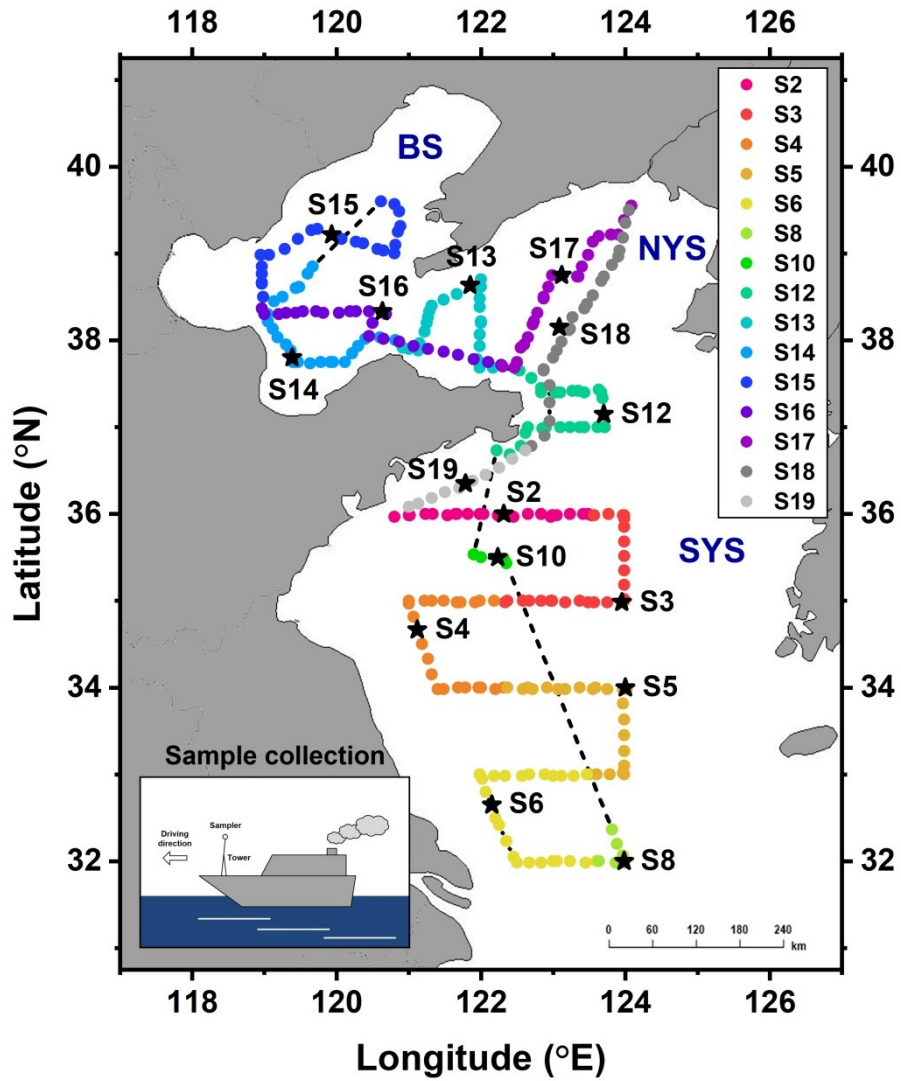

56

57 **Figure S1.** Map of the hourly sampling positions along the cruise track over the  
58 YS-BS, together with a schematic diagram of the sampling setup.

59

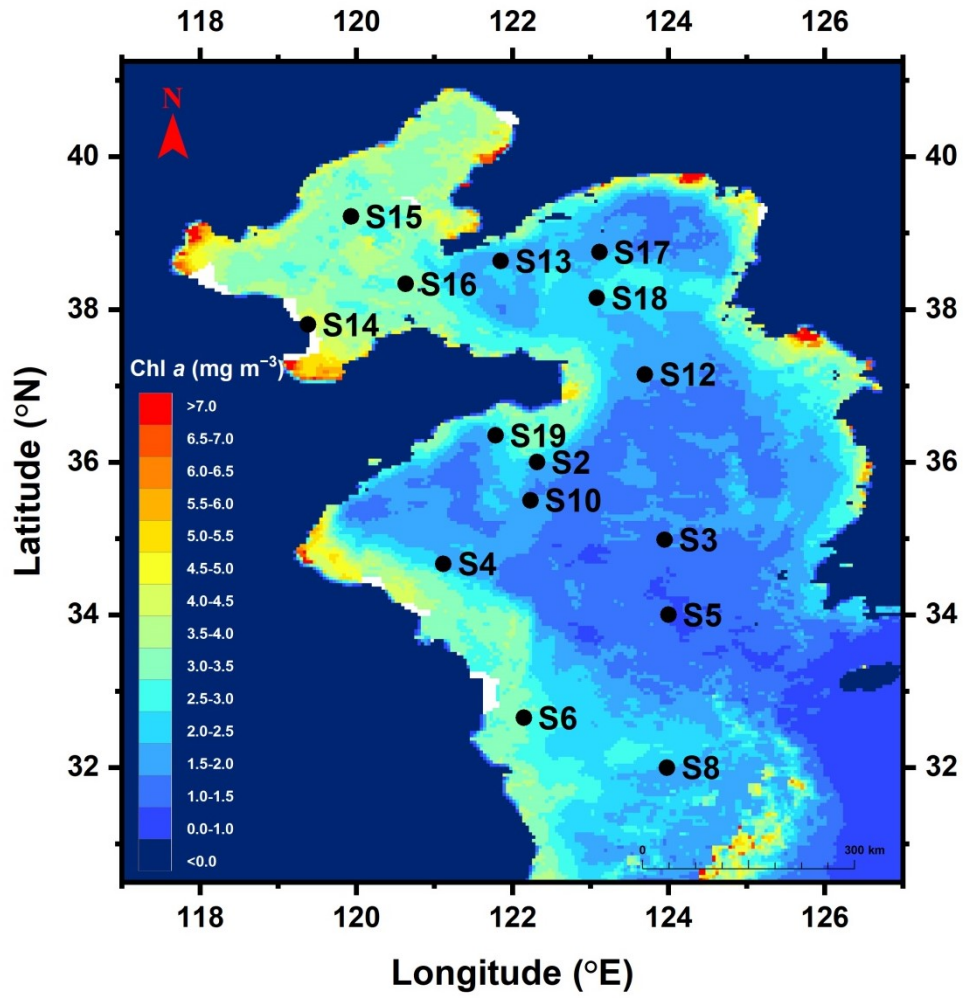

60

61 **Figure S2.** Map of chlorophyll *a* concentrations in surface seawater over the YS-BS  
 62 during the cruise.

63

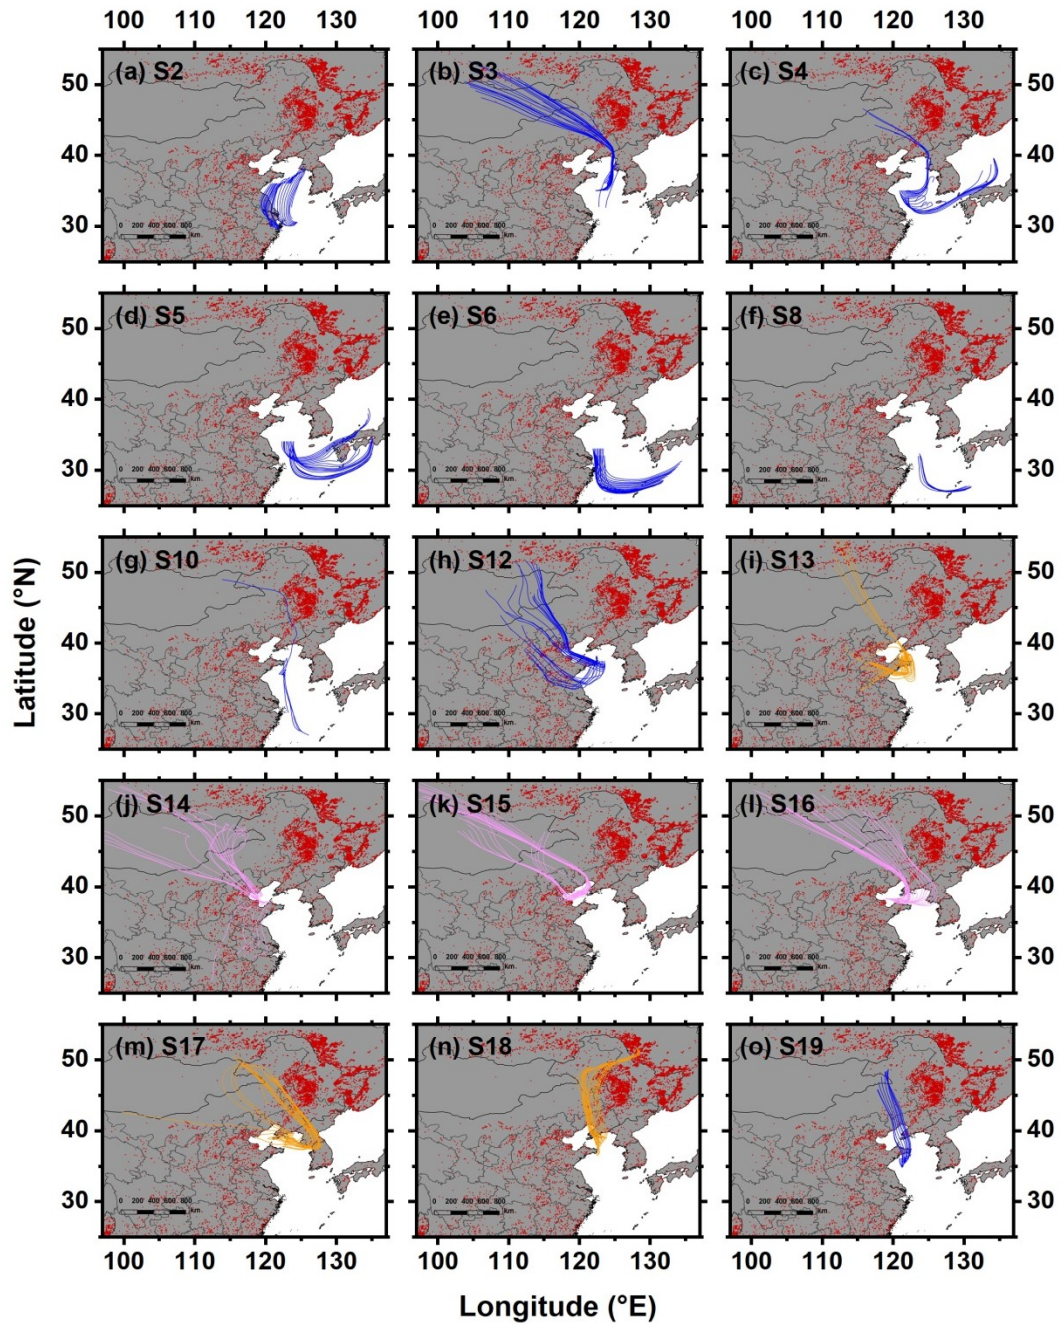

64

65 **Figure S3.** 48 h backward air-mass trajectories starting from the position and time  
 66 point at the beginning of each sampling, with hourly intervals thereafter. Red dots  
 67 indicate fire spots during the entire cruise period. Blue, orange, and pink lines  
 68 represent samples from the SYS, NYS, and BS, respectively.

69

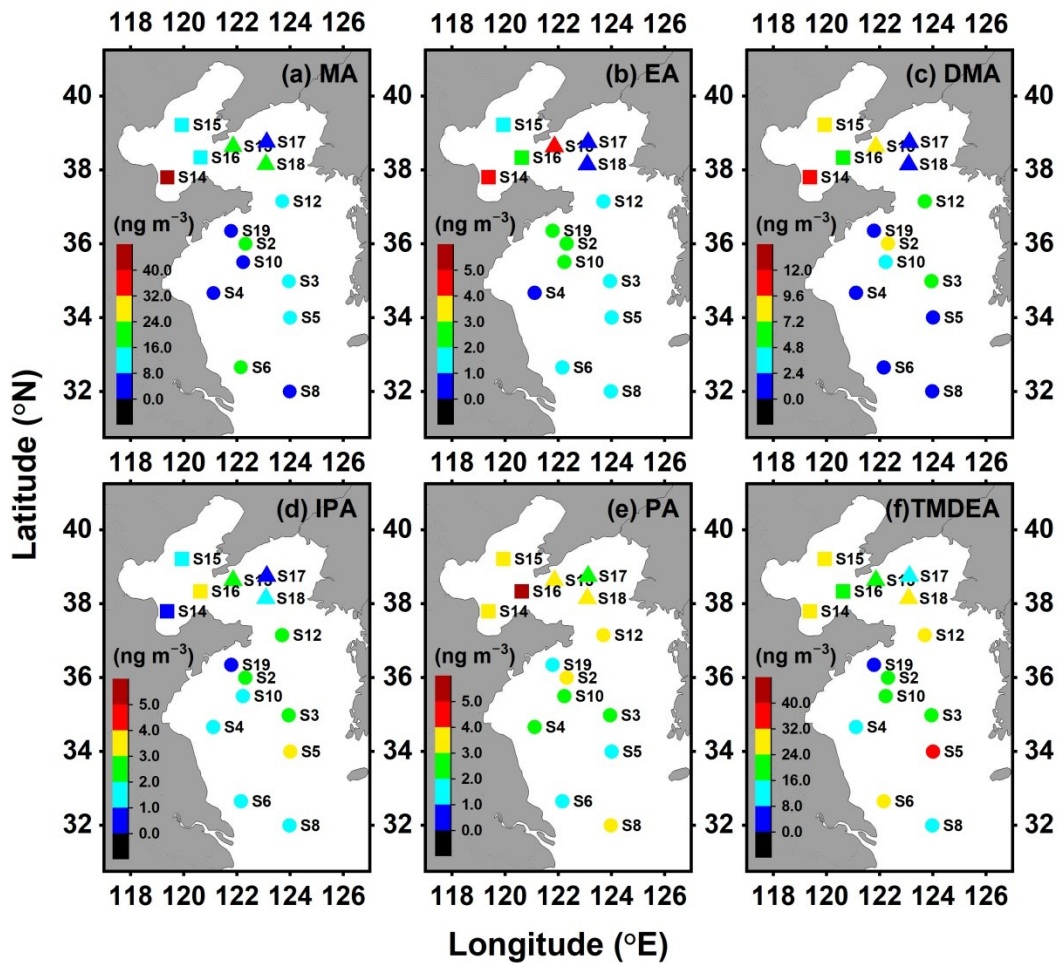

70

71 **Figure S4.** Spatial distributions of MA (a), EA (b), DMA (c), IPA (d), PA (e), and  
 72 TMDEA (f) in TSP samples over the YS–BS. Circles, triangles, and squares represent  
 73 samples from the SYS, NYS, and BS, respectively.

74

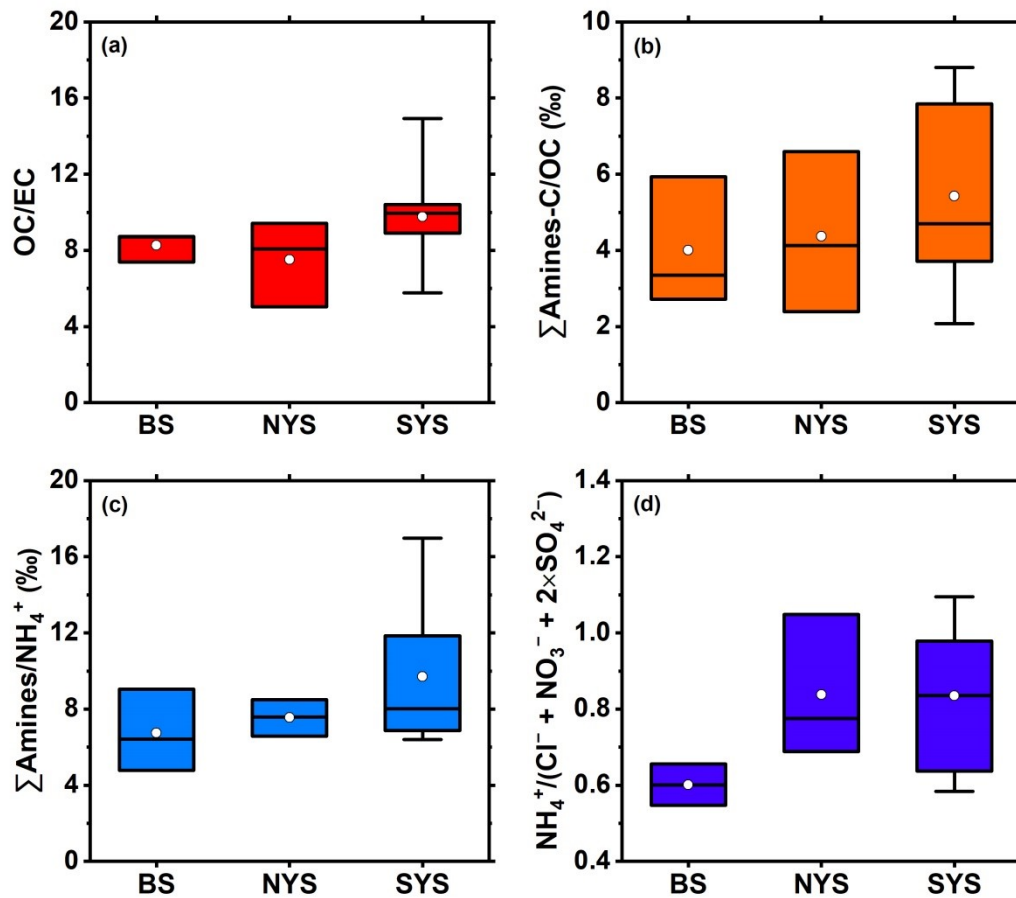

75

76 **Figure S5.** Variations of OC/EC ratios (a),  $\Sigma$ amines-C/OC ratios (b),  $\Sigma$ amines/ $\text{NH}_4^+$   
 77 molar ratios (c), and  $\text{NH}_4^+ / (\text{Cl}^- + \text{NO}_3^- + 2 \times \text{SO}_4^{2-})$  molar ratios (d) in TSP over the  
 78 SYS, NYS, and BS. Lower and upper box boundaries indicate the 25th and 75th  
 79 percentiles; lines within the box indicate the medians; dots within the box indicate the  
 80 mean values; and whiskers below and above the box indicate the minimum and  
 81 maximum values.

82

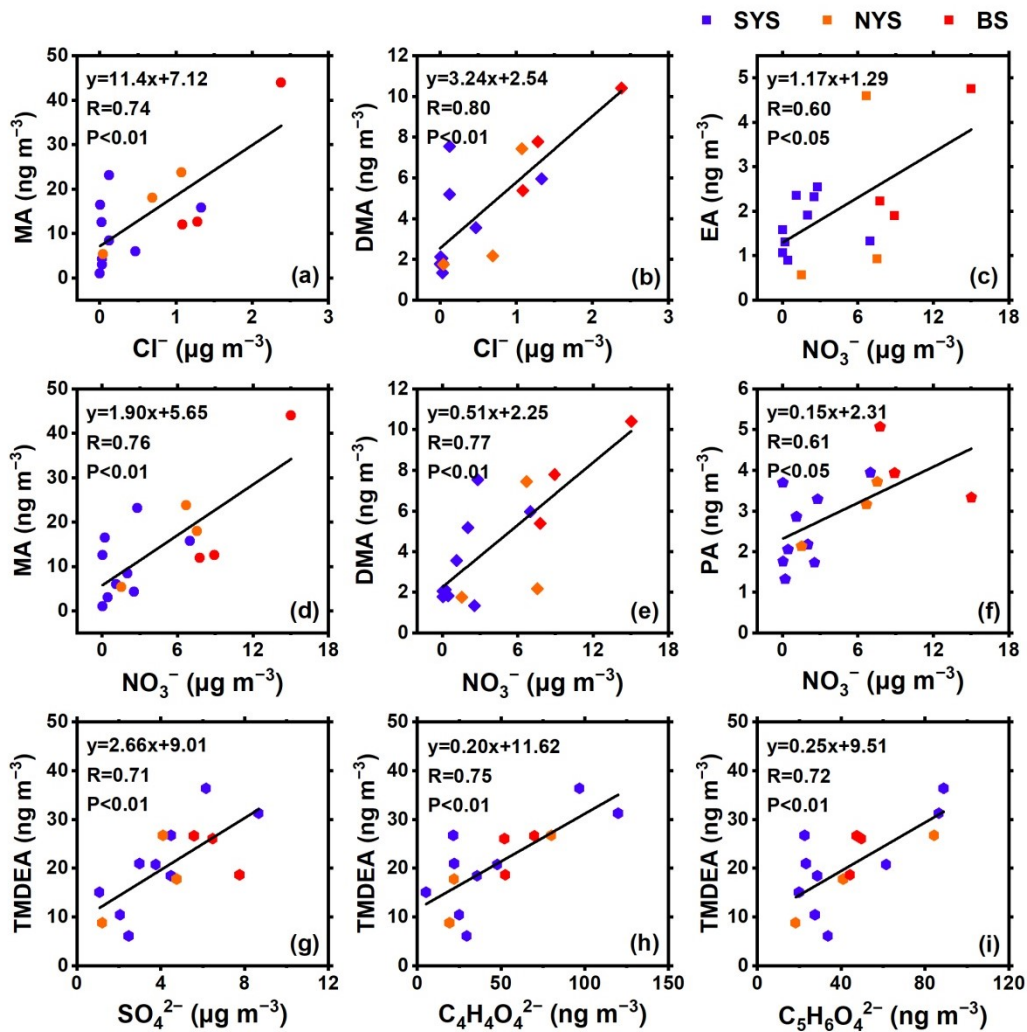

83

84 **Figure S6.** Linear regressions between amines and acidic species in TSP over the  
 85 SYS, NYS, and BS.

86

87 **REFERENCES**

- 88 Chen, D., Yao, X., Chan, C. K., Tian, X., Chu, Y., Clegg, S. L., Shen, Y., Gao, Y., and Gao, H.:  
89 Competitive Uptake of Dimethylamine and Trimethylamine against Ammonia on Acidic Particles  
90 in Marine Atmospheres, *Environmental Science & Technology*, 56, 5430-5439,  
91 <https://doi.org/10.1021/acs.est.1c08713>, 2022.
- 92 Facchini, M., Decesari, S., Rinaldi, M., Carbone, C., Finessi, E., Mircea, M., Sandro, F., Moretti,  
93 F., Tagliavini, E., Ceburnis, D., and O'Dowd, C.: Important Source of Marine Secondary Organic  
94 Aerosol from Biogenic Amines, *Environmental science & technology*, 42, 9116-9121,  
95 <https://doi.org/10.1021/es8018385>, 2008.
- 96 Gibb, S., Mantoura, R., and Liss, P.: Ocean-atmosphere exchange and atmospheric speciation of  
97 ammonia and methylamines in the region of the NW Arabian Sea, *Global Biogeochemical Cycles*  
98 - GLOBAL BIOGEOCHEM CYCLE, 13, 161-178, <https://doi.org/10.1029/98GB00743>, 1999.
- 99 Hu, Q., Yu, P., Zhu, Y., Li, K., Gao, H., and Yao, X.: Concentration, Size Distribution, and  
100 Formation of Trimethylaminium and Dimethylaminium Ions in Atmospheric Particles over  
101 Marginal Seas of China\*, *Journal of the Atmospheric Sciences*, 72, 150522112638006,  
102 <https://doi.org/10.1175/JAS-D-14-0393.1>, 2015.
- 103 Huang, X., Kao, S.-J., Lin, J., Qin, X., and Deng, C.: Development and validation of a HPLC/FLD  
104 method combined with online derivatization for the simple and simultaneous determination of  
105 trace amino acids and alkyl amines in continental and marine aerosols, *PLOS ONE*, 13, e0206488,  
106 <https://doi.org/10.1371/journal.pone.0206488>, 2018.
- 107 Liu, Z., Li, M., Wang, X., Liang, Y., Jiang, Y., Chen, J., Mu, J., Zhu, Y., Meng, H., Yang, L., Hou,  
108 K., Wang, Y., and Xue, L.: Large contributions of anthropogenic sources to amines in fine particles  
109 at a coastal area in northern China in winter, *Science of The Total Environment*, 839, 156281,  
110 <https://doi.org/10.1016/j.scitotenv.2022.156281>, 2022.
- 111 Müller, C., Iinuma, Y., Karstensen, J., Pinxteren, D., S, L., T, G., and Herrmann, H.: Seasonal  
112 variation of aliphatic amines in marine sub-micrometer particles at the Cape Verde Islands,  
113 *Atmospheric Chemistry and Physics*, 9, 9587-9597, <https://doi.org/10.5194/acpd-9-14825-2009>,  
114 2009.
- 115 Pinxteren, M. V., Fomba, K., Pinxteren, D., Triesch, N., Hoffmann, E., Cree, C., Fitzsimons, M.,

116 Tümping, W., and Herrmann, H.: Aliphatic amines at the Cape Verde Atmospheric Observatory:  
117 Abundance, origins and sea-air fluxes, *Atmospheric Environment*, 203, 183-195,  
118 <https://doi.org/10.1016/j.atmosenv.2019.02.011>, 2019.

119 Sorooshian, A., Padro, L., Nenes, A., Feingold, G., McComiskey, A., Hersey, S., Gates, H.,  
120 Jonsson, H., Miller, S., and Stephens, G.: On the Link Between Ocean Biota Emissions, Aerosol,  
121 and Maritime Clouds: Airborne, Ground, and Satellite Measurements Off the Coast of California,  
122 *Global Biogeochem. Cycles*, 23, 34, <https://doi.org/10.1029/2009GB003464>, 2009.

123 Violaki, K., and Mihalopoulos, N.: Water-soluble organic nitrogen (WSO<sub>N</sub>) in size-segregated  
124 atmospheric particles over the Eastern Mediterranean, *Atmospheric Environment*, 44, 4339-4345,  
125 <https://doi.org/10.1016/j.atmosenv.2010.07.056>, 2010.

126 Xie, H., Feng, L., Hu, Q., Zhu, Y., Gao, H., Gao, Y., and Yao, X.: Concentration and size  
127 distribution of water-extracted dimethylammonium and trimethylammonium in atmospheric particles  
128 during nine campaigns - Implications for sources, phase states and formation pathways, *The  
129 Science of the total environment*, 631-632, 130-141,  
130 <https://doi.org/10.1016/j.scitotenv.2018.02.303>, 2018.

131 Yang, H., Xu, J., Wu, W.-S., Wan, C., and Yu, J.: Chemical Characterization of Water-Soluble  
132 Organic Aerosols at Jeju Island Collected During ACE-Asia, *Environmental Chemistry -  
133 ENVIRON CHEM*, 1, 13-17, <https://doi.org/10.1071/EN04006>, 2004.

134 Yu, P., Hu, Q., Li, K., Zhu, Y., Liu, X., Gao, H., and Yao, X.: Characteristics of dimethylammonium  
135 and trimethylammonium in atmospheric particles ranging from supermicron to nanometer sizes over  
136 eutrophic marginal seas of China and oligotrophic open oceans, *Science of The Total Environment*,  
137 572, 813-824, <https://doi.org/10.1016/j.scitotenv.2016.07.114>, 2016.

138 Zhou, S., Li, H., Yang, T., Chen, Y., Deng, C., Gao, Y., Chen, C., and Xu, J.: Characteristics and  
139 sources of aerosol ammoniums over the eastern coast of China: insights from the integrated  
140 observations in a coastal city, adjacent island and surrounding marginal seas, *Atmospheric  
141 Chemistry and Physics*, 19, 10447-10467, <https://doi.org/10.5194/acp-19-10447-2019>, 2019.

142
